# Supplementary material for: Emergence of transmissible SARS-CoV-2 variants with decreased sensitivity to antivirals in immunocompromised patients with persistent infections
Source: PubMed Central journal article supplement (PMC11411086; doi:10.1038/s41467-024-51924-3), 2024-09-18
Supplement: 41467_2024_51924_MOESM1_ESM.pdf [file 41467_2024_51924_MOESM1_ESM.pdf]

## **Emergence of transmissible SARS-CoV-2 variants with decreased sensitivity to antivirals in immunocompromised patients with persistent infections**

### **Supplementary Tables:**

**Supplementary Table 1.** Antiviral treatment and samples sequenced.

**Supplementary Table 2.** Non-synonymous SARS-CoV-2 substitutions identified in nsp5 and nsp12.

**Supplementary Table 3.** Relevant laboratory data of patient 11595 during the disease course.

**Supplementary Table 4.** Immune and serum profiles of patient 16902 during the disease course

**Supplementary Table 5.** Immune and serum profiles of patient 17072 during the course of infection

**Supplementary Table 6.** Virus isolation from nasopharyngeal swabs of immunocompromised patients.

**Supplementary Table 7.** The IC<sub>50</sub> values (μM) of nirmatrelvir and remdesivir against SARS-CoV-2 isolates WT and nsp5<sup>T169I</sup>nsp12<sup>V792I</sup> in this study.

**Supplementary Table 8.** Binding energies (in kcal/mol) of nirmatrelvir drug molecule against nsp5 protein of WT and nsp5<sup>T169I</sup>nsp12<sup>V792I</sup> isolates.

**Supplementary Table 9.** Binding energies (in kcal/mol) of remdesivir drug molecules against nsp12 protein of WT and nsp5<sup>T169I</sup>nsp12<sup>V792I</sup> isolates.

**Supplementary Table 10.** Primers used for whole-genome sequencing of SARS-CoV-2 on the Oxford Nanopore technologies GridION platform.

### **Supplementary Figures:**

**Supplementary Figure 1.** Longitudinal dynamics of non-synonymous SARS-CoV-2 variants.

**Supplementary Figure 2.** Isolation, growth kinetics and plaque size morphology of SARS-CoV-2 isolates.

**Supplementary Figure 3.** The SARS-CoV-2-nsp5<sup>T169I</sup>nsp12<sup>V792I</sup> virus showed decreased sensitivity against nirmatrelvir and remdesivir therapies *in vitro*.

**Supplementary Tables:**

**Supplementary Table 1.** Antiviral treatment and samples sequenced.

| Patient ID | Antiviral drug | Treatment day post-diagnosis | Days PCR +      | Clade (PANGO)   | Days pd | Ct    | Accession    |
|------------|----------------|------------------------------|-----------------|-----------------|---------|-------|--------------|
| 1995       | RDV            | 1-10                         | 28              | 20C (B.1.324)   | 0       | NA    | SAMN40750127 |
|            |                |                              |                 |                 | 1       | NA    | SAMN40750128 |
|            |                |                              |                 |                 | 6       | NA    | SAMN40750128 |
| 2646       | RDV            | 15-19                        | 32 <sup>+</sup> | 21K (BA.1)      | 0       | NA    | SAMN40750130 |
|            |                |                              |                 |                 | 26      | 25.6  | SAMN40750131 |
| 10939      | RDV            | 2-6, 14-18                   | 33 <sup>‡</sup> | 20C (B.1.637)   | 13      | 16.5  | SAMN40750132 |
|            |                |                              |                 |                 | 21      | 25.15 | SAMN40750133 |
| 11595      | RDV            | 2-7                          | 38              | 20G (B.1.2)     | 14      | 19.4  | SAMN40750134 |
|            |                |                              |                 |                 | 20      | 19.25 | SAMN40750135 |
|            |                |                              |                 |                 | 26      | 20.7  | SAMN40750136 |
|            |                |                              |                 |                 | 38      | 20.7  | SAMN40750137 |
| 12105      | RDV            | 16-20                        | 58 <sup>‡</sup> | 20G (B.1.2)     | 0       | 14.8  | SAMN40750138 |
|            |                |                              |                 |                 | 21      | 28.3  | SAMN40750139 |
| 14675      | Paxlovid       | 1-5                          | 66              | 22C (BA.2.12.1) | 0       | 32.3  | SAMN40750140 |
|            | RDV            | 31-35                        |                 |                 | 19      | 23.2  | SAMN40750141 |
|            |                |                              |                 |                 | 24      | 22.5  | SAMN40750142 |
|            |                |                              |                 |                 | 29      | NA    | SAMN40750143 |
|            |                |                              |                 |                 | 51      | NA    | SAMN40750144 |
| 16624      | RDV            | 1-5                          | 42              | 21K (BA.1)      | 0       | NA    | SAMN40750145 |
|            |                |                              |                 |                 | 12      | NA    | SAMN40750146 |
|            |                |                              |                 |                 | 27      | 22.7  | SAMN40750147 |
| 16902      | RDV            | 26-37, 47-51                 | 50 <sup>‡</sup> | 21K (BA.1.15)   | 0       | NA    | SAMN40750148 |
|            |                |                              |                 |                 | 1       | NA    | SAMN40750149 |
|            |                |                              |                 |                 | 7       | NA    | SAMN40750150 |
|            |                |                              |                 |                 | 11      | NA    | SAMN40750151 |
|            |                |                              |                 |                 | 14      | NA    | SAMN40750152 |
|            |                |                              |                 |                 | 26      | NA    | SAMN40750153 |
|            |                |                              |                 |                 | 28      | 25.1  | SAMN40750154 |
|            |                |                              |                 |                 | 36      | NA    | SAMN40750155 |
|            |                |                              |                 |                 | 42      | NA    | SAMN40750156 |
|            |                |                              |                 |                 | 47      | 23    | SAMN40750157 |
| 16915      | RDV            | 0-2                          | 63              | 21K (BA.1.17.2) | 0       | NA    | SAMN40750158 |
|            |                |                              |                 |                 | 14      | 20.83 | SAMN40750159 |
|            |                |                              |                 |                 | 21      | 22.38 | SAMN40750160 |
|            |                |                              |                 |                 | 35      | 19.8  | SAMN40750161 |
| 17062      | RDV            | 0-4                          | 72              | 21K (BA.1.1)    | 8       | NA    | SAMN40750162 |
|            |                |                              |                 |                 | 11      | 18.76 | SAMN40750163 |
| 17320      | RDV            | 31-33                        | 34              | 21K (BA.1.1)    | 30      | 22.4  | SAMN40750170 |
|            |                |                              |                 |                 | 31      | 21.4  | SAMN40750171 |
|            |                |                              |                 |                 | 34      | 25.5  | SAMN40750172 |
| 17386      | RDV            | 3-7, 38-42, 108-111, 148-152 | 157             | 21K (BA.1.1)    | 104     | 24.8  | SAMN40750173 |
|            |                |                              |                 |                 | 141     | NA    | SAMN40750174 |
|            |                |                              |                 |                 | 143     | 20.8  | SAMN40750175 |
| 17423      | RDV            | 0-2                          | 190             | 21K (BA.1)      | 0       | NA    | SAMN40750176 |
|            |                |                              |                 |                 | 3       | 21.5  | SAMN40750177 |
|            |                |                              |                 |                 | 15      | 20.5  | SAMN40750178 |
|            |                |                              |                 |                 | 32      | 14.5  | SAMN40750179 |
|            |                |                              |                 |                 | 39      | 15.2  | SAMN40750180 |
|            |                |                              |                 |                 | 42      | 28.2  | SAMN40750181 |
|            |                |                              |                 |                 | 53      | 18    | SAMN40750182 |
|            |                |                              |                 |                 | 60      | 23.4  | SAMN40750183 |
|            |                |                              |                 |                 | 67      | 25.5  | SAMN40750184 |
|            |                |                              |                 |                 | 81      | 19.7  | SAMN40750185 |
|            |                |                              |                 |                 | 102     | 20    | SAMN40750186 |
|            |                |                              |                 |                 | 137     | 20    | SAMN40750187 |
|            |                |                              |                 |                 | 141     | 21.5  | SAMN40750188 |
| 152        | NA             | SAMN40750189                 |                 |                 |         |       |              |
| 18323      | RDV            | 74-78                        | 131             | 21L             | 0       | 26    | SAMN40750190 |

|       |          |                           |    |                 |    |      |              |
|-------|----------|---------------------------|----|-----------------|----|------|--------------|
|       | Paxlovid | 81-85                     |    | (BA.2)          | 6  | 17.1 | SAMN40750191 |
|       |          |                           |    |                 | 29 | 16.3 | SAMN40750192 |
|       |          |                           |    |                 | 73 | NA   | SAMN40750193 |
| 17072 | Paxlovid | 0-4                       | 81 | 21K<br>(BA.1.1) | 22 | NA   | SAMN40750164 |
|       | RDV      | 20-24,<br>31-35,<br>63-67 |    |                 | 52 | 21.9 | SAMN40750165 |
|       |          |                           |    |                 | 68 | 20.2 | SAMN40750166 |
|       |          |                           |    |                 | 77 | NA   | SAMN40750167 |
|       |          |                           |    |                 | 80 | 25.7 | SAMN40750168 |
|       |          |                           |    |                 | 81 | NA   | SAMN40750169 |

Note: <sup>+</sup> indicates that the patient died in the following month after hospitalization without retesting for SARS-CoV-2. <sup>‡</sup> indicates that the patient died while SARS-CoV-2 positive. RDV-remdesivir. pd-post COVID-19 diagnosis. Ct-cycle threshold. NA-not available. Sequencing data are available under the BioProject PRJNA1088540.

**Supplementary Table 2.** Non-synonymous SARS-CoV-2 substitutions identified in nsp5 and nsp12.

Samples are compared to their SARS-CoV-2 clade reference. Mutations exceeding 98% frequency of the sequence reads in all samples sequenced per patient may signify strain-specific diversity that established the infection, rather than fixation over the course of the infection.

| Patient ID | Antiviral drug | Treatment day post-diagnosis | Clade (PANGO)   | Total Collections Sequenced | Variant      | Frequency Range | Number of Samples/Collections with Variant |
|------------|----------------|------------------------------|-----------------|-----------------------------|--------------|-----------------|--------------------------------------------|
| 1995       | RDV            | 1-10                         | 20C (B.1.324)   | 3                           | nsp12: A16V  | 1               | 3                                          |
| 10939      | RDV            | 2-6, 14-18                   | 20C (B.1.637)   | 2                           | nsp5: P96S   | 1               | 2                                          |
| 11595      | RDV            | 2-7                          | 20G (B.1.2)     | 4                           | nsp12: E136A | 0.27            | 1                                          |
|            |                |                              |                 |                             | nsp12: V166L | 0.11            | 1                                          |
|            |                |                              |                 |                             | nsp12: Q444K | 0.05 - 0.07     | 2                                          |
|            |                |                              |                 |                             | nsp12: V792I | 0.09 - 0.31     | 3                                          |
|            |                |                              |                 |                             | nsp12: M794I | 0.17 - 0.9      | 4                                          |
|            |                |                              |                 |                             | nsp12: C799F | 0.1             | 1                                          |
|            |                |                              |                 |                             | nsp12: V820G | 0.03            | 1                                          |
| 12105      | RDV            | 16-20                        | 20G (B.1.2)     | 2                           | nsp12: V605I | 1               | 2                                          |
| 16902      | RDV            | 26-37, 47-51                 | 21K (BA.1.15)   | 10                          | nsp12: C464Y | 1               | 2                                          |
|            |                |                              |                 |                             | nsp12: C799Y | 0.98            | 1                                          |
| 16915      | RDV            | 0-2                          | 21K (BA.1.17.2) | 4                           | nsp12: T644M | 0.06 - 0.07     | 2                                          |
| 17072      | Paxlovid       | 0-4                          | 21K (BA.1.1)    | 6                           | nsp5: M165I  | 0.09            | 1                                          |
|            | RDV            | 20-24, 31-35, 63-67          |                 |                             | nsp5: T169I  | 0.34 - 0.92     | 4                                          |
|            |                |                              |                 |                             | nsp5: A173T  | 0.1 - 0.74      | 2                                          |
|            |                |                              |                 |                             | nsp5: G283C  | 0.05            | 1                                          |
|            |                |                              |                 |                             | nsp12: T643I | 0.26            | 1                                          |
|            |                |                              |                 |                             | nsp12: V792I | 0.27 - 0.98     | 4                                          |
|            |                |                              |                 |                             | nsp12: E796K | 0.23 - 1        | 3                                          |
| 17320      | RDV            | 31-33                        | 21K (BA.1.1)    | 3                           | nsp12: I171M | 0.05            | 1                                          |
| 17423      | RDV            | 0-2                          | 21K (BA.1)      | 14                          | nsp5: L253I  | 0.03 - 0.04     | 2                                          |
|            |                |                              |                 |                             | nsp12: V820G | 0.03            | 1                                          |
|            |                |                              |                 |                             | nsp12: F859L | 0.03            | 1                                          |

|       |          |        |               |   |               |      |   |
|-------|----------|--------|---------------|---|---------------|------|---|
| 18323 | RDV      | 74-78  | 21L<br>(BA.2) | 4 | nsp5:<br>T211 | 0.04 | 1 |
|       | Paxlovid | 81-85* |               |   |               |      |   |

\* Antiviral treatment course occurred after all samples were collected and sequenced.

**Supplementary Table 3.** Relevant laboratory data of patient 11595 during the disease course.

| Laboratory Parameter                   | Days after COVID-19 Diagnosis |      |      |      |       |      |      |      |      |
|----------------------------------------|-------------------------------|------|------|------|-------|------|------|------|------|
|                                        | Normal Range                  | 0    | 7    | 14   | 20    | 23   | 26   | 30   | 38   |
| CT value                               |                               |      |      | 19.4 | 19.25 |      | 20.7 |      | 20.7 |
| WBC count, ( $\times 10^3/uL$ )        | 3.4-11.2                      | 3.79 | 2.33 | 2.8  | 1.47  | 1.45 | 1.62 | 3.98 | 4.02 |
| Neutrophil count, ( $\times 10^3/uL$ ) | 1.8-7.0                       | **   | **   | 2.38 | 1.22  | 0.85 | 1.38 | 3.0  | 3.59 |
| Neutrophils (%)                        | 45-75                         | **   | **   | 85   | 83.1  | 82   | 81   | 93   | 89.4 |
| Lymphocyte count, ( $\times 10^3/uL$ ) | 1.18-3.74                     | **   | **   | 0.22 | 0.13  | 0.08 | 0.16 | 0.08 | 0.08 |
| Lymphocytes (%)                        | 20-50                         | **   | **   | 8    | 8.8   | 8    | 10   | 2    | 2    |
| D- Dimer (ng/mL)                       | 0-229                         | **   | **   | **   | **    | 451  | **   | **   | **   |
| CRP (mg/dL)                            | $\leq 0.9$                    | **   | **   | **   | **    | 19.0 | **   | **   | **   |
| ESR (mm/hr)                            | 0-20                          | **   | 5    | **   | **    | 25   | **   | **   | **   |
| LDH (U/L)                              | 118-230                       | **   | 321  | **   | 280   | 375  | 317  | 444  | **   |

Abbreviations. CRP: C-reactive protein; CT: cycle threshold; ESR: Erythrocyte sedimentation rate; LDH: Lactate dehydrogenase; WBC: White blood cells; \*\* Indicates that these laboratory values were not available.

**Supplementary Table 4.** Immune and serum profiles of patient 16902 during the disease course.

| Laboratory Parameter                            | Normal Range | Days after COVID-19 Diagnosis |      |      |      |      |      |      |      |      |
|-------------------------------------------------|--------------|-------------------------------|------|------|------|------|------|------|------|------|
|                                                 |              | 0                             | 1    | 7    | 11   | 14   | 28   | 36   | 47   | 52   |
| CT value                                        |              |                               |      |      |      |      | 25.1 |      | 23   |      |
| WBC count, ( $\times 10^3/\mu\text{L}$ )        | 3.4-11.2     | 1.0                           | 1.22 | 5.8  | 2.2  | 2.8  | 3.53 | 4.17 | 1.03 | 1.63 |
| Neutrophil count, ( $\times 10^3/\mu\text{L}$ ) | 1.56-6.13    | 0.6                           | 0.83 | 4.2  | 1.5  | 2.1  | 2.93 | 3.59 | 0.83 | 1.55 |
| Neutrophils (%)                                 | 45-75        | 61.4                          | 66   | 80   | 66   | 80   | 83   | 86   | 79   | 95   |
| Lymphocyte count, ( $\times 10^3/\mu\text{L}$ ) | 1.18-3.74    | 0.2                           | 0.17 | 0.52 | 0.37 | 0.28 | 0.19 | 0.17 | 0.08 | 0.08 |
| Lymphocytes (%)                                 | 20-50        | 18.5                          | 14   | 9    | 16   | 10   | 5.4  | 4    | 8    | 6    |
| D- Dimer (ng/mL)                                | 0-229        | **                            | **   | **   | **   | **   | 160  | 338  | 175  | 1588 |
| CRP (mg/dL)                                     | $\leq 0.9$   | **                            | 9.2  | **   | **   | **   | 7.9  | 0.7  | 0.4  | 0.4  |
| LDH (U/L)                                       | 118-230      | 273                           | 274  | 523  | 312  | 325  | 414  | 363  | 502  | 575  |
| Procalcitonin (ng/mL)                           | $\leq 0.08$  | **                            | **   | **   | **   | **   | **   | **   | **   | **   |

Abbreviations. CRP: C-reactive protein; CT: cycle threshold; ESR: Erythrocyte sedimentation rate; LDH: Lactate dehydrogenase; WBC: White blood cells; \*\* Indicates that these laboratory values were not available.

**Supplementary Table 5.** Immune and serum profiles of patient 17072 during the course of infection

| Laboratory Parameter                  | Normal Range | Days post-diagnosis |       |       |       |       |       |       |       |       |       |       |       |      |      |       |       |       |
|---------------------------------------|--------------|---------------------|-------|-------|-------|-------|-------|-------|-------|-------|-------|-------|-------|------|------|-------|-------|-------|
|                                       |              | -2                  | 22    | 23    | 24    | 30    | 31    | 34    | 36    | 42    | 46    | 52    | 60    | 66   | 68   | 77    | 80    | 81    |
| CT value                              |              |                     |       |       |       |       |       | 24.4  |       |       |       | 21.9  | 26.5  |      | 20.2 |       | 25.7  |       |
| WBC count, ( $\times 10^9/L$ )        | 3.4-11.2     | 10.5                | 14.12 | 18.36 | 15.4  | 21.22 | 12.86 | 21.79 | 23.53 | 15.57 | 15.23 | 15.72 | 14.18 | 9.6  | 8.82 | 14.43 | 11.48 | 14.04 |
| Neutrophil count, ( $\times 10^9/L$ ) | 1.8-7.0      | 7.6                 | 12.86 | 15.97 | 11.99 | 19.1  | 12.86 | 19.02 | 22.12 | 14.57 | 13.07 | 14.16 | 12.39 | 7.5  | 6.33 | 12.43 | 10.23 | 12.12 |
| Neutrophils (%)                       | 45-75        | 72.4                | 90    | 87    | 79.6  | 88    | 91.5  | 87.3  | 94.0  | 88.0  | 85.8  | 84.5  | 87.4  | 78.2 | 71.7 | 86.2  | 89.1  | 86.3  |
| Lymphocyte count, ( $\times 10^9/L$ ) | 1.18-3.74    | 1.4                 | 0.57  | 1.1   | 0.81  | 0.85  | 0.39  | 0.67  | 0.71  | 0.60  | 0.55  | 0.74  | 0.50  | 0.99 | 1.13 | 0.61  | 0.46  | 1.08  |
| Lymphocytes (%)                       | 20-50        | 13.1                | 3     | 6     | 5.4   | 4     | 2.7   | 3.1   | 3.0   | 3.6   | 3.6   | 4.5   | 3.5   | 10.3 | 12.8 | 4.2   | 4.0   | 7.7   |
| D-Dimer (ng/mL)                       | 0-229        |                     | <150  |       |       | <150  |       |       |       |       |       | 161   |       | 156  |      |       |       |       |
| CRP (mg/dL)                           | $\leq 0.9$   |                     |       | 8.7   | 4.9   | 13.7  |       | 14    | 20    | 11.3  | 9.1   |       |       |      |      |       |       |       |
| ESR (mm/hr)                           | 0-20         |                     | 59    |       |       | 49    |       |       |       |       |       |       |       |      |      |       |       |       |
| LDH (U/L)                             | 118-230      | 183                 |       |       | 289   | 386   |       |       |       |       |       |       |       |      |      |       |       |       |
| Procalcitonin (ng/mL)                 | $\leq 0.08$  |                     | 0.72  |       |       | 0.75  |       | 0.49  |       | 0.29  |       |       |       |      |      |       | 0.61  |       |

Abbreviations. CRP: C-reactive protein; CT: cycle threshold; ESR: Erythrocyte sedimentation rate; IL-6: Interleukin-6; LDH: Lactate dehydrogenase; WBC: White blood cells; \*\* Indicates that no other laboratory values were available on the first day of SARS-CoV2 infection (Day 0).



**Supplementary Table 6.** Virus isolation from nasopharyngeal swabs of immunocompromised patients.

| Patient ID | Viral load (Ct value) | Days post-diagnosis | Virus isolation | Passages in Vero E6 TMPRSS2 | Consensus mutations (clinical sample vs prototype strain) | Consensus mutations in nsp5/nsp12 (clinical sample vs passage 3) | Clade |
|------------|-----------------------|---------------------|-----------------|-----------------------------|-----------------------------------------------------------|------------------------------------------------------------------|-------|
| 11595      | 20.7                  | 38                  | yes             | 3                           | nsp12 M794I, Spike E484Q, Spike Q677H                     | nsp12 Q444K, nsp12 I794M, nsp12 M900V                            | 20G   |
| 16902      | NA                    | 0                   | yes             | 3                           | No mutations                                              | No mutations                                                     | 21K   |
|            | NA                    | 1                   | no              | -                           | -                                                         | -                                                                | -     |
|            | NA                    | 7                   | no              | -                           | -                                                         | -                                                                | -     |
|            | NA                    | 11                  | no              | -                           | -                                                         | -                                                                | -     |
|            | NA                    | 18                  | no              | -                           | -                                                         | -                                                                | -     |
|            | 19.10                 | 42                  | no              | -                           | -                                                         | -                                                                | -     |
|            | 25.4                  | 50                  | no              | -                           | -                                                         | -                                                                | -     |
| 17072      | 26.5                  | 60                  | no              | -                           | -                                                         | -                                                                | -     |
|            | NA                    | 77                  | yes             | 3                           | nsp5 T169I, nsp12 V223I, nsp12 V792I                      | No mutations                                                     | 21K   |
|            | 25.7                  | 80                  | no              | -                           | -                                                         | -                                                                | -     |
|            | NA                    | 81                  | yes             | 3                           | nsp5 T169I, nsp12 V223I, nsp12 V792I                      | nsp5 M165I, nsp5 I169T, nsp12 I792V                              | 21K   |

Note: NA: Not available; - not available as no virus was isolated.

**Supplementary Table 7.** The IC<sub>50</sub> values (μM) of nirmatrelvir and remdesivir against SARS-CoV-2 isolates WT and nsp5<sup>T169I</sup>nsp12<sup>V792I</sup> in this study.

|                                              | Pre-treatment         |      | Simultaneous treatment |      | Post-treatment        |      |
|----------------------------------------------|-----------------------|------|------------------------|------|-----------------------|------|
|                                              | IC <sub>50</sub> (μM) | Fold | IC <sub>50</sub> (μM)  | Fold | IC <sub>50</sub> (μM) | Fold |
| Nirmatrelvir                                 |                       |      |                        |      |                       |      |
| WT                                           | 1.77                  | 1    | 0.95                   | 1    | 1.67                  | 1    |
| nsp5 <sup>T169I</sup> nsp12 <sup>V792I</sup> | 3.93                  | 2.22 | 2.89                   | 3.04 | 3.62                  | 2.17 |
|                                              |                       |      |                        |      |                       |      |
| Remdesivir                                   |                       |      |                        |      |                       |      |
| WT                                           | 8.8                   | 1    | 6.68                   | 1    | 7.5                   | 1    |
| nsp5 <sup>T169I</sup> nsp12 <sup>V792I</sup> | 16.7                  | 1.9  | 15.29                  | 2.34 | 14.56                 | 1.94 |

**Supplementary Table 8.** Binding energies (in kcal/mol) of nirmatrelvir drug molecule against nsp5 protein of WT and nsp5<sup>T169I</sup>nsp12<sup>V792I</sup> isolates. Hydrogen and hydrophobic interactions are highlighted, providing insights into the molecular interactions at the binding interface.

|                                                                               | Binding Energy (kcal/mol) | H-bond      |              |           |                               | Hydrophobic Interactions                                                              |
|-------------------------------------------------------------------------------|---------------------------|-------------|--------------|-----------|-------------------------------|---------------------------------------------------------------------------------------|
|                                                                               |                           | Residue No. | No. of Bonds | Molecules | Bond Length (Å <sup>0</sup> ) |                                                                                       |
| nsp5 of WT docked with nirmatrelvir                                           | -7.8                      | His163      | 2            | NE2-F3    | 3.16                          | Met49, Leu141, Asn142, Ser144, Cys145, His164, Met165, Asp187, Arg188, Gln189, Gln192 |
|                                                                               |                           |             |              | NE2-F2    | 3.17                          |                                                                                       |
|                                                                               |                           | Glu166      | 2            | N-O2      | 3.10                          |                                                                                       |
|                                                                               |                           |             |              | O-N2      | 3.25                          |                                                                                       |
| nsp5 of nsp5 <sup>T169I</sup> nsp12 <sup>V792I</sup> docked with nirmatrelvir | -6.9                      | Gly143      | 1            | N-O1      | 3.01                          | His41, Met49, Phe140, Leu141, Asn142, His164, Met165, Gln189                          |
|                                                                               |                           | Cys145      | 1            | SG-O1     | 3.03                          |                                                                                       |
|                                                                               |                           | Glu166      | 1            | N-O3      | 3.25                          |                                                                                       |

**Supplementary Table 9.** Binding energies (in kcal/mol) of remdesivir drug molecules against nsp12 protein of WT and nsp5<sup>T169L</sup>nsp12<sup>V792I</sup> isolates. Hydrogen and hydrophobic interactions are highlighted, providing insights into the molecular interactions at the binding interface.

|                                                                       | Binding Energy (kcal/mol) | H-bond      |              |           |                               | Hydrophobic Interactions                                               |
|-----------------------------------------------------------------------|---------------------------|-------------|--------------|-----------|-------------------------------|------------------------------------------------------------------------|
|                                                                       |                           | Residue No. | No. of Bonds | Molecules | Bond Length (Å <sup>0</sup> ) |                                                                        |
| nsp12 of WT docked with RTP                                           | -7.1                      | Asp618      | 1            | OD1-N5    | 3.13                          | Lys621, Ser681, Ser682, Thr687, Asp761,                                |
|                                                                       |                           | Tyr619      | 1            | O-O2      | 2.89                          |                                                                        |
|                                                                       |                           | Cys622      | 1            | N-O2      | 3.12                          |                                                                        |
|                                                                       |                           | Asp623      | 2            | OD1-O13   | 2.84                          |                                                                        |
|                                                                       |                           |             |              | N-O13     | 3.03                          |                                                                        |
|                                                                       |                           | Thr680      | 1            | OG1-O9    | 2.86                          |                                                                        |
|                                                                       |                           | Asn691      | 1            | ND2-O6    | 2.81                          |                                                                        |
|                                                                       |                           | Ser759      | 1            | OG-O6     | 2.84                          |                                                                        |
| Asp760                                                                | 2                         | OD2-O12     | 3.08         |           |                               |                                                                        |
|                                                                       |                           | OD1-O12     | 3.29         |           |                               |                                                                        |
| nsp12 of nsp5 <sup>T169L</sup> nsp12 <sup>V792I</sup> docked with RTP | -7.1                      | Asn497      | 2            | N-O9      | 3.05                          | Val495, Asn496, Arg569, Gln573, Leu576, Thr686, Thr687, Gly683, Tyr689 |
|                                                                       |                           |             |              | O-O9      | 3.18                          |                                                                        |
|                                                                       |                           | Ser682      | 1            | O-O13     | 2.80                          |                                                                        |
|                                                                       |                           | Asp684      | 1            | O-O13     | 2.70                          |                                                                        |
| Ala685                                                                | 1                         | O-O2        | 3.22         |           |                               |                                                                        |

**Supplementary Table 10.** Primers used for whole-genome sequencing of SARS-CoV-2 on the Oxford Nanopore technologies GridION platform.

| Name              | Sequence                        | Name                | Sequence                    |
|-------------------|---------------------------------|---------------------|-----------------------------|
| 24 pool 1         | TTCTCCTAAGAAGCTATATAAAATCACATGG | 23 R pool 2         | TTCGCTGATTTTGGGGTCCA        |
| 24 R pool 1       | GGCTCTTCCATATAGGCAGCT           | 23 F pool 2         | TTTCCTCTGGCTGTTATGGC        |
| 24 F pool 1       | TGGGTAGTCTTGTAGTGCCT            | 21 R pool 2 alt_2   | TTGCAGCAGGATCCACAAGA        |
| 22 R pool 1       | GCTGAGCCACATCAAGCCTA            | 21 R pool 2         | AGCCAGCTATAAAACCTAGCCA      |
| 22 F pool 1       | CCTCAATGAGGTTGCCAAGA            | 21 F pool 2 alt_2   | TTTCAAACACGTGCAGGCTG        |
| 20 R pool 1       | CTGCACCAAGTGACATAGTGT           | 19 F pool 2         | ACAGATGCGCAAACAGGTTTC       |
| 20 F pool 1       | GGACCTTGAAGGAAAACAGGGT          | 17 R pool 2         | TGTCACTACAAGGCTGTGCA        |
| 18 R pool 1       | TGGCCATCTTACACCAAAGC            | 17 F pool 2 alt_omi | TGTGTACATTGGCGACCCTG        |
| 18 F pool 1       | TGCGGCTTGTAGAAAGGTTCA           | 15 R pool 2         | GCCTCATAAAACTCAGGTTCCC      |
| 16 R pool 1       | ACAATTCAGCAGGACAACGC            | 15 F pool 2         | ATGCACGCTGCTTCTGGTAA        |
| 16 R pool 1 alt   | AGGACAACGCCGACAAGTTC            | 13 R pool 2         | GCAGACGGTACAGACTGTGT        |
| 16 F pool 1       | TGCTTACCCACTTACTAAACATCCT       | 13 R pool 2 alt     | CCCACAGGGTCATTAGCACA        |
| 16 F pool 1 alt   | TGAACGGTTCGTGTCTTTAGC           | 13 F pool 2 alt_2   | TCTTGTGCTGCCGGTACTAC        |
| 14 R pool 1       | GCAGCATTACCATCCTGAGC            | 11 R pool 2 alt_2   | TGGCTGCTGTTGTAAGAGGT        |
| 14 F pool 1       | ATCCTTGGTGGTGCATCGT             | 11,855 F pool 2     | GTTGGGTGTTGGTGGCAAAC        |
| 12 R pool 1 alt_2 | GCAAGTACAAACCTACCTCCCT          | 11 F pool 2 alt     | ATTGTTGGGTGTTGGTGGCA        |
| 12 F pool 1 alt_2 | AATTTGACCGTGATGCAGCC            | 9 R pool 2 alt_omi  | YTCATAGCACATTGGTAAACA<br>C  |
| 10 R pool 1       | CTGGACACATTGAGCCCACA            | 9 F pool 2          | TTTTGTGCTGCCTGGTTTGC        |
| 10 F pool 1       | GACACCTAAGTATAAGTTTGTTCGC       | 9 F pool 2 alt      | GCCCATTGATTGCTGCAGTC        |
| 8 R pool 1        | GCTGATGTTGCAAAGTCAGTGT          | 7 F pool 2 alt_omi  | ACCAACCATATCCAAACGCA        |
| 8 F pool 1        | GCCCCGATTCAGCTATGGT             | 7 R pool 2 alt_omi  | TGCAAAAGCCTTTACCTCCA        |
| 6 R pool 1        | TCAATAGCCACCACATCACCA           | 5 R pool 2 alt_2    | GTTCATACTGAGCAGGTGGTG       |
| 6 R pool 1 alt    | CAATAGCCACCACATCACCA            | 5 F pool 2 alt_2    | ACGTGTTGAGGCTTTTGAGT        |
| 6 F pool 1 alt_2  | GCTGTTATGTACATGGGCACAC          | 3 R pool 2          | ACCGAGCAGCTTCTTCCAAA        |
| 4 R pool 1 alt_2  | TGCTGACATGTACCTACCCAG           | 3 F pool 2          | GTGAAGAAGAAGAGTTTGAGC<br>CA |
| 4 F pool 1        | GGTGTGGTTGATTATGGTGCT           | 1 R pool 2          | GACCTTCGGAACCTTCTCCA        |
| 4 F pool 1 alt    | GGGTGTGGTTGATTATGGTGCT          | 1 F pool 2 alt_omi  | ACCAACCAACTTTYGATCTCT       |
| 2 R pool 1        | GCAGAAGTGGCACCAAATTCC           | 19 R pool 2 omi     | TCTACCAATGTTCTAAAGCCG       |
| 2 F pool 1        | TTCTTCGTAAGGGTGGTTCGC           |                     |                             |

**Supplementary Figures:**

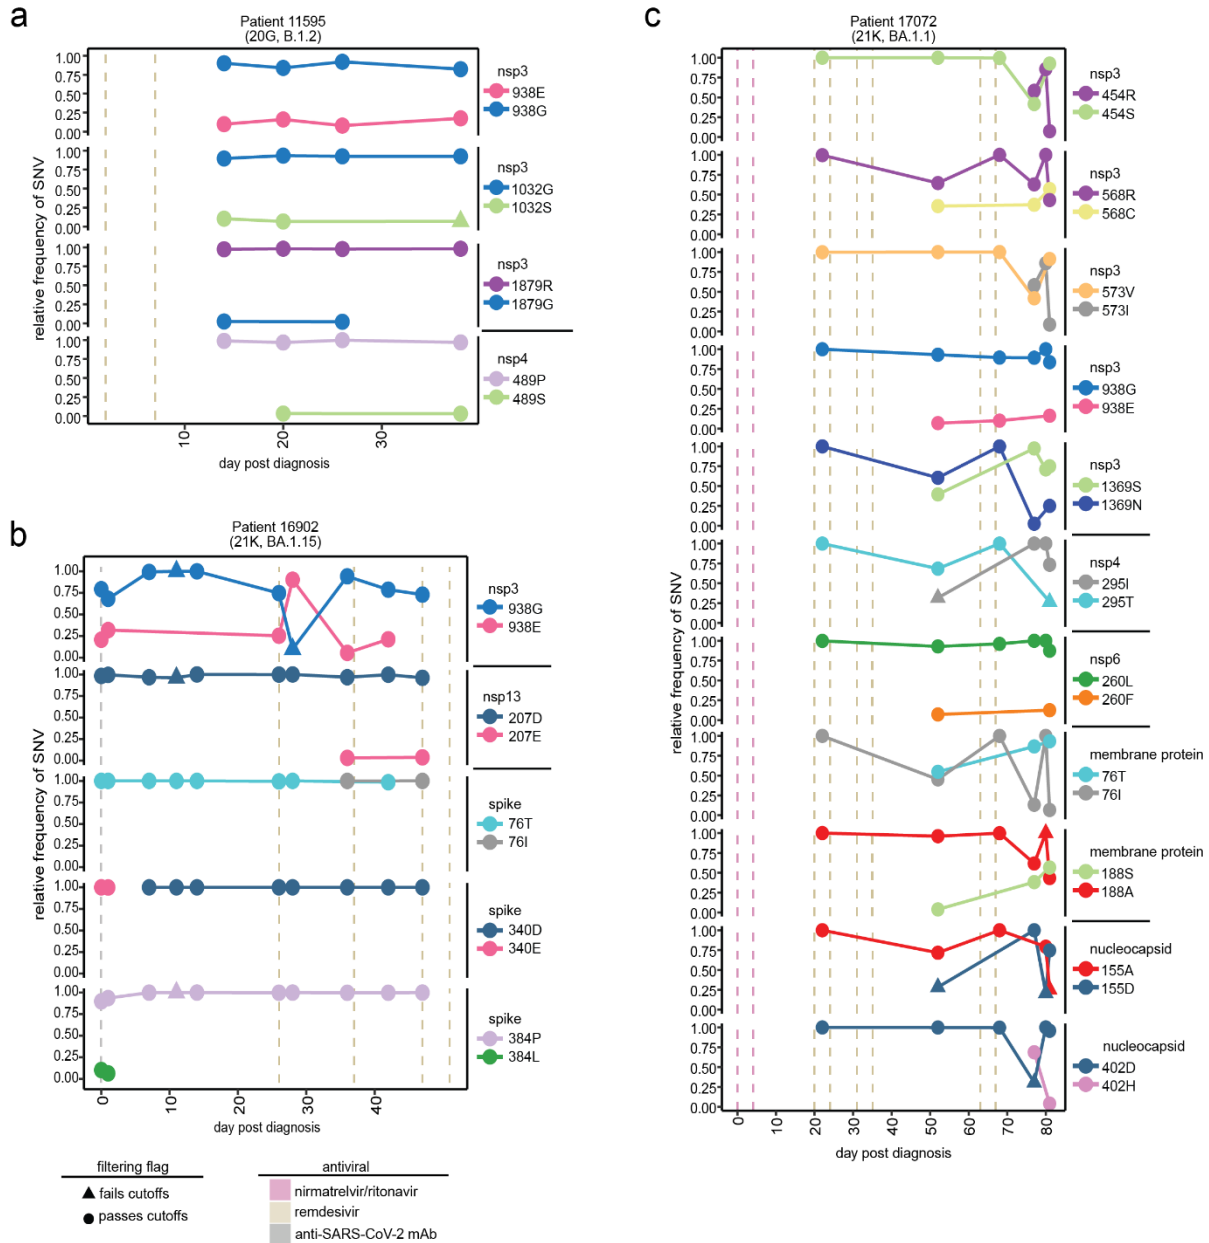

Supplementary Figure 1. **Longitudinal dynamics of non-synonymous SARS-CoV-2 variants.** The relative frequency (y-axis) of non-synonymous SARS-CoV-2 single-nucleotide variants (SNVs) that were present at multiple timepoints throughout the infection for patients (a) 11595, (b) 16902, and (c) 17072. Variant data are grouped by the coding region, amino acid position, and amino acid, with the color of each point and line representing the amino acid and the shape indicating whether the variant was found above (passes, circle) or below (fails, triangle) our detection cutoffs (Methods). All time points along the x-axis are referenced from the date of each patient's initial positive COVID-19 test result, with day 0 marking the date of the first positive test at the New York Presbyterian Hospital. Dashed vertical lines specify each patient's SARS-CoV-2 specific treatment course and are colored based on the treatment category (pink: nirmatrelvir-ritonavir, tan: remdesivir, gray: Sotrovimab). Mutations found in nsp5 and nsp12 are excluded and can be found in Fig. 1b-d. Clade and PANGO lineage designations are included with Patient IDs.

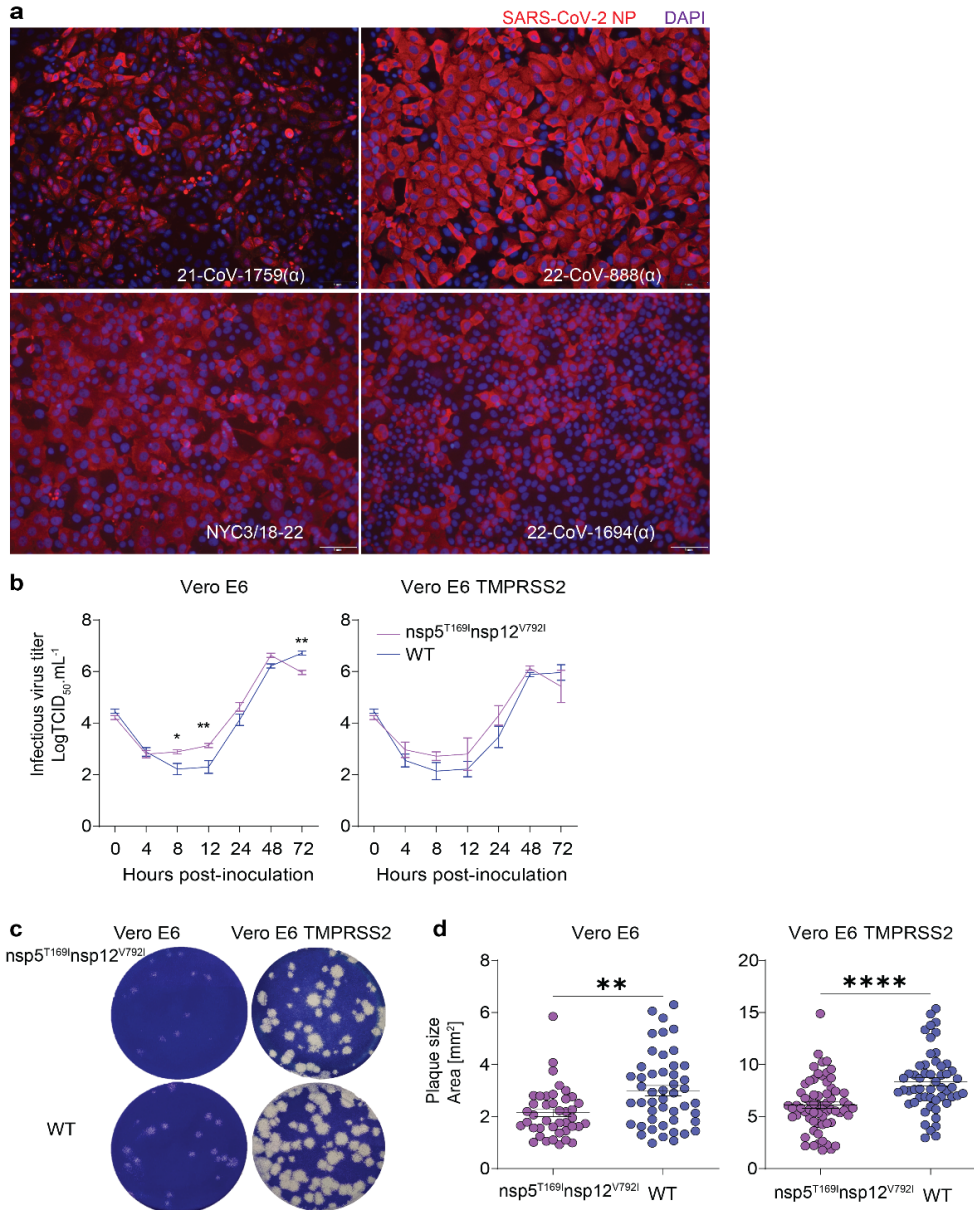

Supplementary Figure 2. **Isolation, growth kinetics and plaque size morphology of SARS-CoV-2 isolates.** (a) Immunofluorescence staining confirming the isolation of SARS-CoV-2 isolates from patient samples. Vero E6 Tmprss2 cells were infected with SARS-CoV-2 isolates (MOI 0.1). After 48 hours, the cell monolayer was fixed and stained with SARS-CoV-2 NP specific monoclonal antibody (red) and counterstained with DAPI (blue). Bar (1 mm) indicates magnification. (b) Viral growth kinetics. Vero E6 and Vero E6 Tmprss2 cells were infected (MOI 0.1) with SARS-CoV-2- $nsp5^{T169I}nsp12^{V792I}$  and WT viruses and virus titers were determined at indicated time points by limiting dilution method and expressed as  $TCID_{50}.mL^{-1}$ . The data represents mean  $\pm$  SEM,  $n = 3$ , three independent experiments. 2-way ANOVA followed by multiple comparisons test, \*  $p < 0.05$  and \*\*  $p < 0.01$ . (c) Viral plaque phenotype. Vero E6 cells were infected (30 plaque forming unit/well) with SARS-CoV-2- $nsp5^{T169I}nsp12^{V792I}$  and WT isolates and overlaid with medium containing agar. Plates were incubated at 37 °C for 72 h, the agar overlay was removed, cells were fixed, and the monolayer was stained with 0.5% crystal violet. Representative images of two independent experiments were shown. (d) The diameters of viral plaques from Figure c were measured using a scale in millimeters. The data represent mean  $\pm$  SEM,  $n = 41-65$ , 2 independent experiments. Mann-Whitney U test, \*\*  $p < 0.01$  and \*\*\*\*  $p < 0.0001$ .



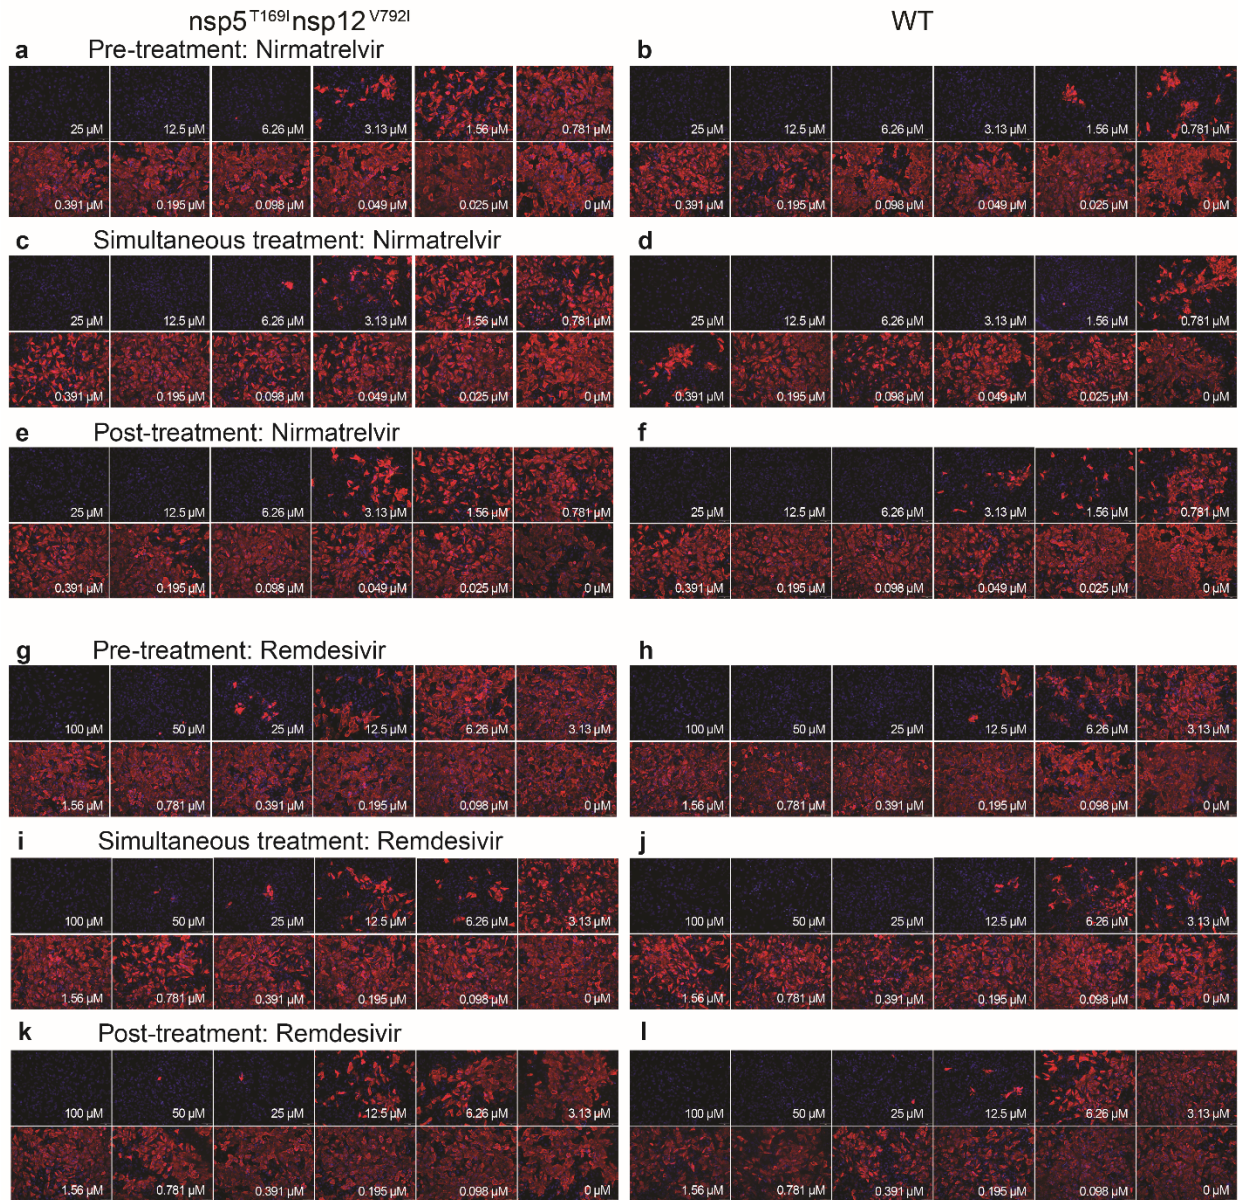

Supplementary Figure 3. The SARS-CoV-2-nsp5<sup>T169I</sup>nsp12<sup>V792I</sup> virus showed decreased sensitivity against nirmatrelvir and remdesivir therapies *in vitro*. Vero E6 cells were treated with indicated concentration of nirmatrelvir at pre-infection, at infection or at post-infection period and infected with 200 TCID<sub>50</sub>/well of SARS-CoV-2-nsp5<sup>T169I</sup>nsp12<sup>V792I</sup> (a, c, e) or WT (b, d, f). After 48 hours, the cell monolayer was fixed and stained with SARS-CoV-2 NP specific monoclonal antibody (red) and counterstained with DAPI (blue). Vero E6 cells were treated with indicated concentration of remdesivir at pre-treatment, at infection or at post-infection period and infected with 200 TCID<sub>50</sub>/well of SARS-CoV-2-nsp5<sup>T169I</sup>nsp12<sup>V792I</sup> (g, i, k) or WT (h, j, l). After 48 hours, the cell monolayer was fixed and stained with SARS-CoV-2 NP specific monoclonal antibody (red) and counterstained the nucleus with DAPI (blue). (a-l) Bar (1 mm) indicates magnification.
